# Supplementary material for: Electroactive scaffolds of biodegradable polyurethane/polydopamine-functionalized graphene oxide regulating the inflammatory response and revitalizing the axonal growth cone for peripheral nerve regeneration
Source: Royal Society of Chemistry journal article supplement (doi:10.1039/d3tb00837a), 2023-01-01
Supplement: d3tb00837a1.pdf [file d3tb00837a1.pdf]

Supporting information for

**Electroactive scaffolds of biodegradable polyurethane/polydopamine-functionalized graphene oxide regulating inflammatory response and revitalizing axonal growth cone for peripheral nerve regeneration**

Qiao Zhang,<sup>a</sup> Jinlin Chen,<sup>b</sup> Yuan Feng,<sup>b</sup> Jingjing Lin,<sup>b</sup> Jiehua Li,<sup>b</sup> Yanchao Wang,<sup>\*a</sup> and Hong Tan<sup>b</sup>

<sup>a</sup> Department of Neurosurgery, West China Hospital, Sichuan University, Chengdu, Sichuan, 610000, China.

<sup>b</sup> College of Polymer Science and Engineering, State Key Laboratory of Polymer Materials Engineering, Med-X center of materials, Sichuan University, Chengdu, Sichuan, 610065, China.

\* Corresponding authors.

Yanchao Wang: wangyanchao@scu.edu.cn

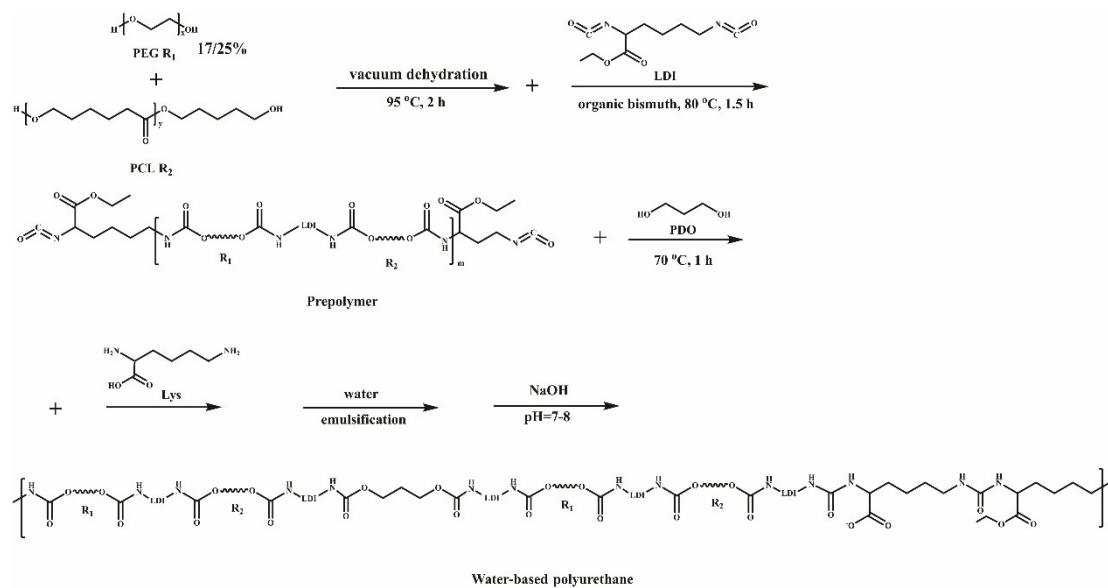

Fig. S1 Schematic of the synthesis of BWPU.

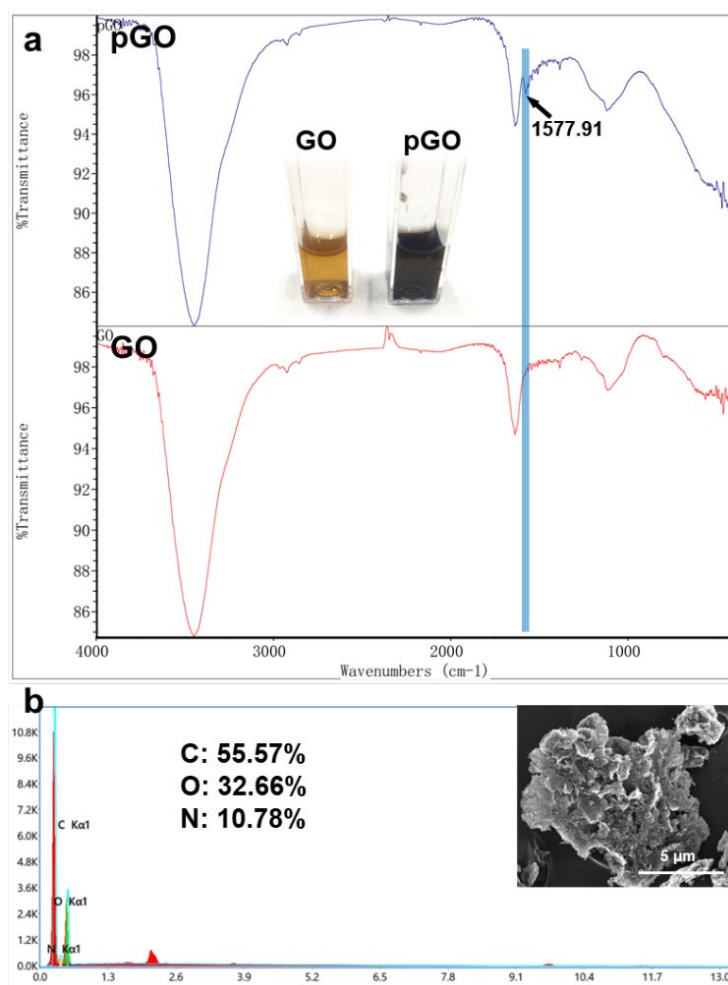

Fig. S2 (a) FTIR spectrum of pGO and GO. Inset: photographs of the aqueous dispersion of pGO and GO. (b) EDS spectrum and the corresponding SEM image of pGO.

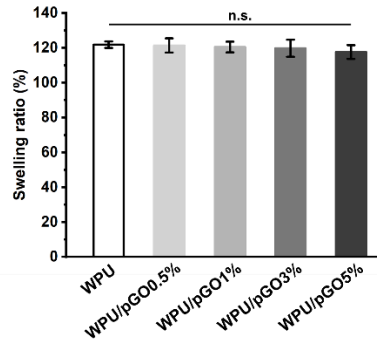

Fig. S3 Swelling ratios of WPU/pGO scaffolds. After measuring the volume of scaffolds in the dry state, they were soaked in PBS overnight to obtain the volume in the swelling state, and then the swelling ratio was calculated as the ratio between the wet and wet states.

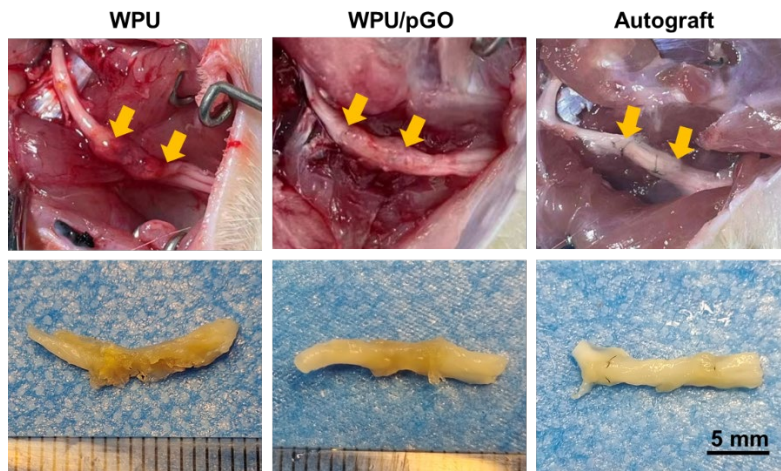

Fig. S4 Gross observation of the regenerated sciatic nerve (between yellow arrows) at weeks 12 postoperatively.
